# Supplementary material for: The plant-specific histone residue Phe41 is important for genome-wide H3.1 distribution
Source: PubMed Central journal article supplement (PMC5809374; doi:10.1038/s41467-018-02976-9), 2018-02-12
Supplement: 41467_2018_2976_MOESM2_ESM.pdf [file 41467_2018_2976_MOESM2_ESM.pdf]

## **Description of Supplementary Files**

File Name: Supplementary Data 1

Description: Amino acid sequences of histone 3 in multiple plant species.

File Name: Supplementary Data 2

Description: Numbers of nuclei examined in immunofluorescence experiments.

File Name: Supplementary Data 3

Description: Primers used in this study.

File Name: Supplementary Data 4

Description: Read and peak numbers for each ChIP-seq experiment.

File Name: Supplementary Data 5

Description: List of original data sources used in this study.
